# Supplementary material for: Evolutionary Changes in Left-Right Visceral Asymmetry in Astyanax Cavefish
Source: bioRxiv or medRxiv preprint supplement (doi:10.1101/2020.05.15.098483), 2020-05-15
Supplement: Supplementary file [file media-1.pdf]

## Evolutionary Changes in Left-Right Visceral Asymmetry in *Astyanax* Cavefish

Li Ma<sup>1</sup>, Mandy Ng<sup>1</sup>, Janet Shi<sup>1</sup>, Aniket V. Gore<sup>2</sup>, Daniel Castranova<sup>2</sup>, Brant M. Weinstein<sup>2</sup>, and William R. Jeffery<sup>1\*</sup>

<sup>1</sup>Department of Biology, University of Maryland, College Park, MD 20742 USA and

<sup>2</sup>Division of Developmental Biology, Eunice Kennedy Shriver National Institute of Child Health and Human Development, NIH, Bethesda, MD, 20892 USA

\*Corresponding Author

**Supplementary Files**

**Supplementary Movie.**

Video showing beating of right (D) lopped and left (L) looped hearts in Pachón cavefish at 3 days post-fertilization.

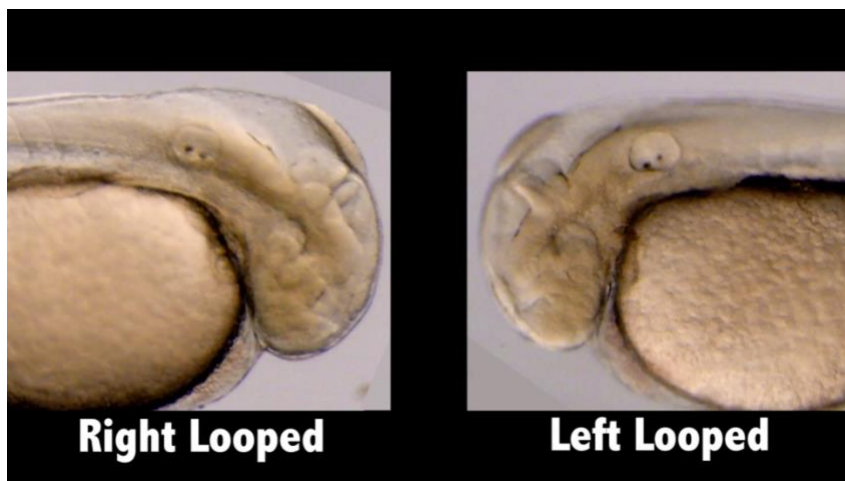

**Supplementary Figures  
and Legends.**

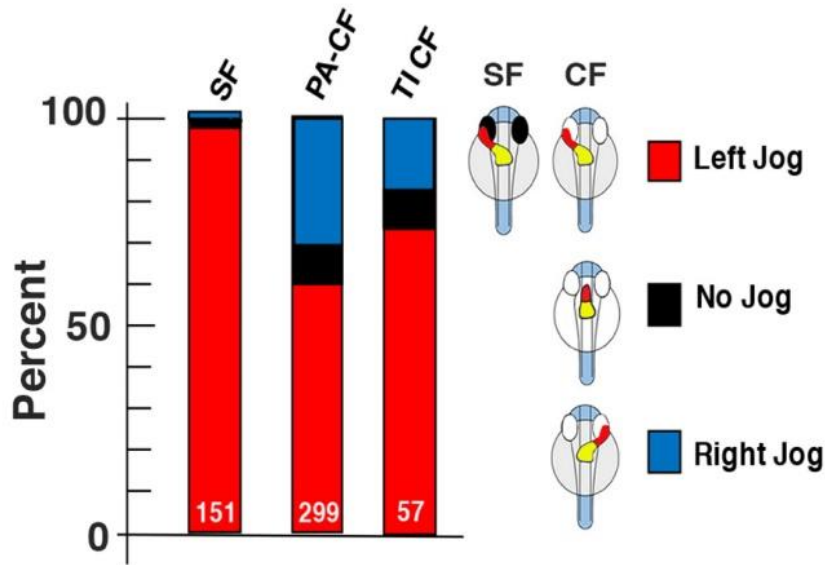

Figure S1. Bar graph showing the proportion of left jogged, non-jogged, and right jogged cardiac tubes in surface fish (SF), Pachón cavefish (PA-CF), and Tinaja cavefish (TI-CF) at 1.5 dpf. N is shown at the bottom of each bar.

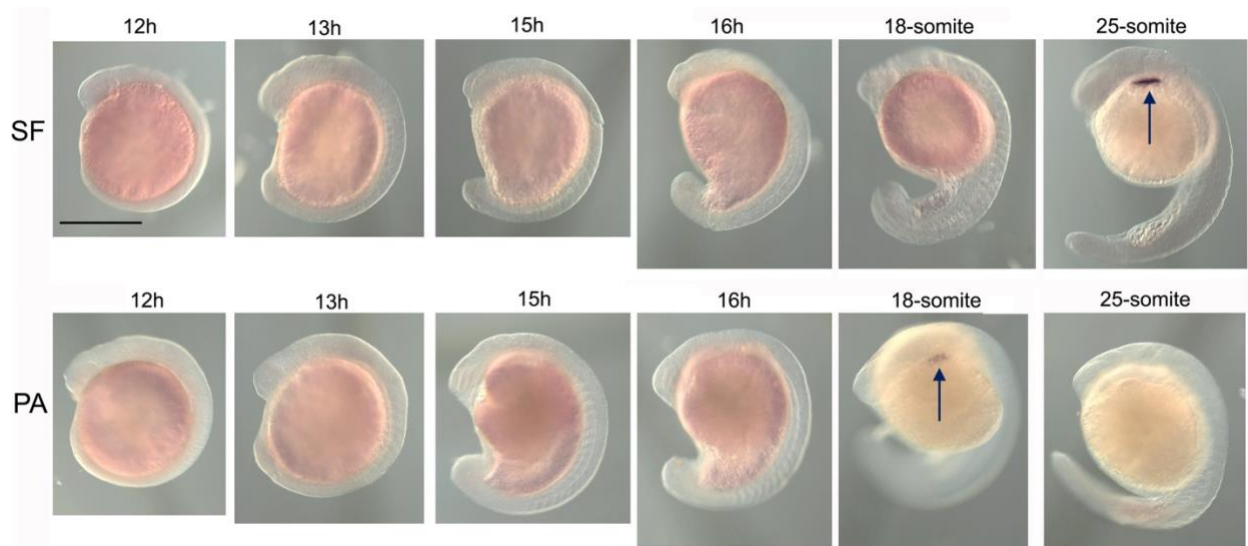

Figure S2. Determination of *lft2* gene expression in left lateral plate mesoderm (LM) of surface fish and cavefish (F 61 PA-CF) by *in situ* hybridization between the 12 hour (h) and 25-somite stages. The *lft2* gene is expressed strongly in the anterior left LPM at the

25-somite stage in surface fish embryos (arrow) but weakly in cavefish embryos at the 18-somite stage (arrow). Scale bar is 200  $\mu\text{m}$ ; magnification is the same in all frames.

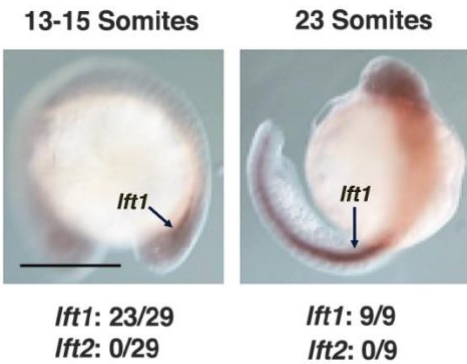

Figure S3. Double *in situ* hybridization with *lft1* and *lft2* probes. Stages shown at top of each frame. Number of *lft1* or *lft2* stained individuals per total number shown on bottom of frames. Scale bar is 200  $\mu\text{m}$ ; magnification is the same in all frames.

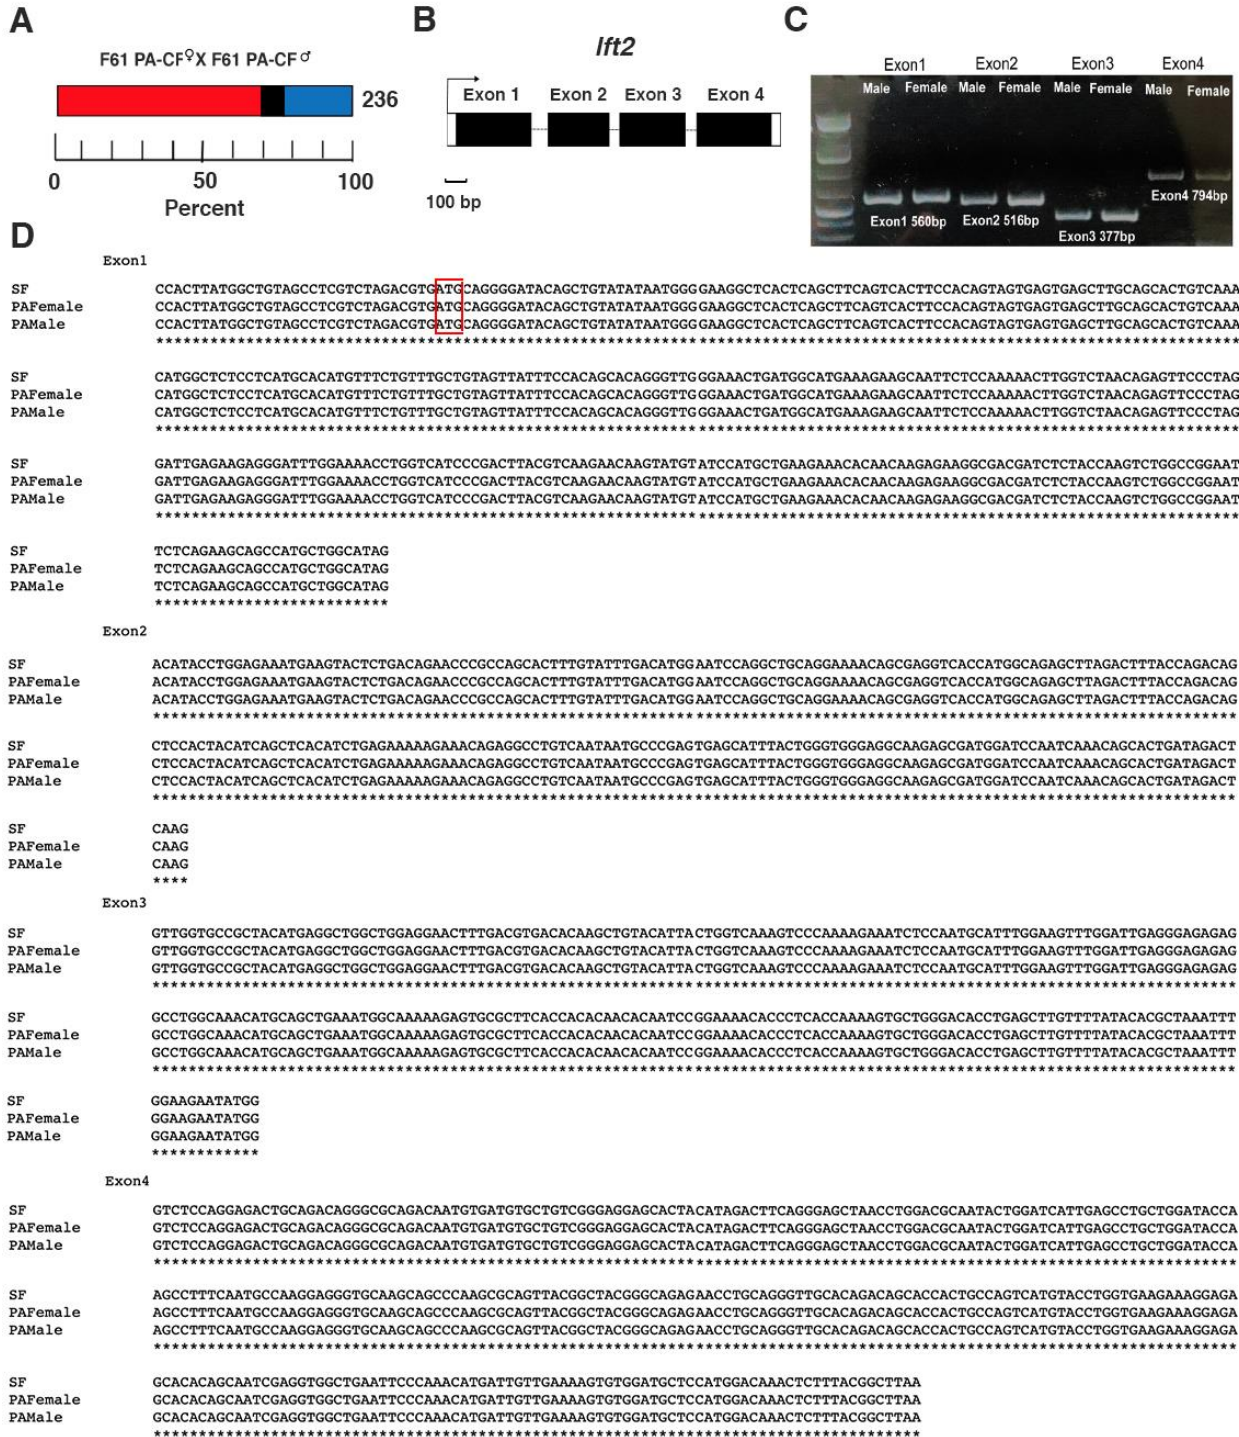

Figure S4. Survey of cavefish *Ift2* genomic DNA for coding region changes. A. Comparison of numbers of embryos with D-looping hearts, no looping hearts, and left looping hearts in the progeny of a single surface fish x surface fish and a cavefish x

cavefish (both F61 PA-CF) cross. B. Exon-intron organization of the *Astyanax lft2* gene. C. PCR amplification of 4 *lft2* exons from male and female F61 PA-CF individuals. Exons shown as red outlined bars; bars showing 5' UTR in exon 1 is not filled. Introns shown as lines. D. PCR amplification of *lft2* exons from male and female individuals used in the cavefish x cavefish cross in A. D. Alignment of *lft2* exon sequences obtained from the male and female individuals used in the cavefish x cavefish cross in A with the surface fish *lft2* exon sequence. Red box: ATG translation start site. Asterisks: identical nucleotides.

### Supplementary Tables

Supplementary Table 1. Oligonucleotide primers used to amplify gene sequences for preparation of RNA probes for *in situ* hybridization.

| Gene          | Primers                                                        |
|---------------|----------------------------------------------------------------|
| <i>spaw</i>   | Forward: TTTAACGTGACCGCTCTGCT<br>Reverse: TGCATGTAGGCGTGATTGGT |
| <i>lefty1</i> | Forward: CAGGACCCCAGCGATAACTC<br>Reverse: GCCGCACTTCTCCACTATCA |
| <i>lefty2</i> | Forward: GGCAAAAAGAGTGCGCTTCA<br>Reverse: TGTCCATGGAGCATCCACAC |
| <i>pitx2</i>  | Forward: CCCAAAATGGACGCAAAGGG<br>Reverse: TATGGTGGCAATTGCAGGGT |
| <i>cbsa</i>   | Forward: CGCATGCTCATCAGAGACGA<br>Reverse: GGCAAAGTGATCCGTCTCCA |

Supplementary Table 2. Oligonucleotide primers used in RT-PCR.

| Gene name    | Forward primers         | Reverse primers        |
|--------------|-------------------------|------------------------|
| <i>spaw</i>  | CGCTAAAGACTGTCATCAGGTTG | AACAACAGCCCGTTTGGTTG   |
| <i>pitx2</i> | CTACACACCCCCTTAGCCAT    | GTCTTTATCTGCGCACTCGG   |
| <i>lft1</i>  | GACCCAGCGATAACTCACT     | CTGCAGCACTGACCCTGA     |
| <i>lft2</i>  | GAATCAGTCTTCGCGTTATTTCC | GACGTAAGTCGGGATGACCA   |
| <i>ndr1</i>  | ACCCTAAGCGATACAATGCCT   | AGCTTCAGAAGACTCTGCATGT |
| <i>ndr2</i>  | CACGCCTACATGCAGAGTC     | TCTCGCCGTTCTCGTAGTAG   |
| <i>gapdh</i> | TCCTGAACTCAATGGCAAGC    | TTCTCCAAGCGGACAGTCAA   |

Supplementary Table 3. Oligonucleotide primers used to amplify *lft2* exons by PCR.

| <i>lft2</i> Exon | Forward primers         | Reverse primers         |
|------------------|-------------------------|-------------------------|
| 1                | GCACAGTTTGGGCAACAGAG    | AAAGCAGAGCCTTAACATACCT  |
| 2                | GCATAGGTATGTTAAGGCTCTGC | CACGATGACAAAACCTACCCCT  |
| 3                | TCAGGGGTAGTTTTGTCATCGT  | ACACACACCTCAACATTACCTCA |
| 4                | TGAGGTAATGTTGAGGTGTGTGT | AACTGTCGAGTGTTGCCGTA    |
